# Supplementary material for: Hierarchical nanosheet-based Bi2MoO6 microboxes for efficient photocatalytic performance
Source: Royal Society of Chemistry journal article supplement (doi:10.1039/c8dt00061a), 2018-01-01
Supplement: c8dt00061a1.pdf [file c8dt00061a1.pdf]

Supporting Information for

# Hierarchical nanosheet-based $\text{Bi}_2\text{MoO}_6$ microboxes for efficient photocatalytic performance

Yulong Jia,<sup>a</sup> Ying Ma,<sup>a,b\*</sup> Jinzhu Tang,<sup>a</sup> Wenbin Shi<sup>a</sup>

<sup>a</sup> School of Chemistry and Chemical Engineering, Yangtze Normal University  
Chongqing, 408000 (China)  
Email: yma2017@126.com

<sup>b</sup> Department of Applied Chemistry, Faculty of Engineering, Kyushu Institute of Technology, 1-1 Sensuicho, Tobata, Kitakyushu 804-8550, Japan

## Additional Figures and Discussions

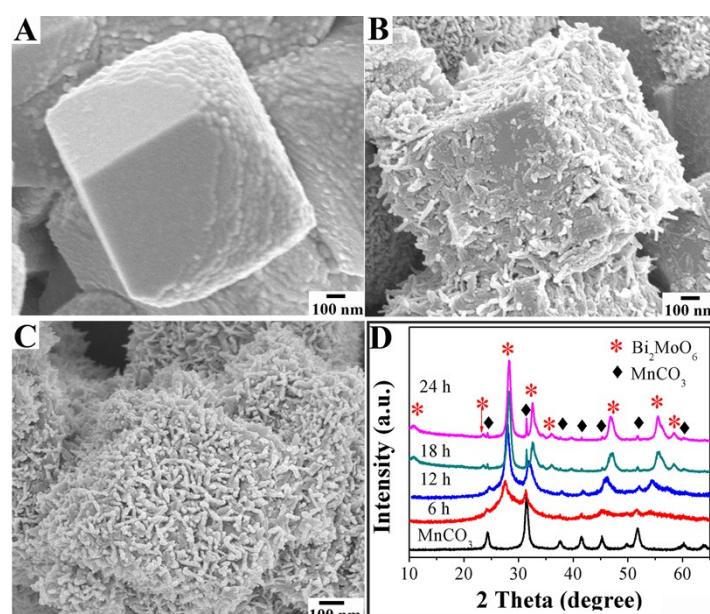

**Fig. S1.** SEM images of intermediate samples collected at (A) 6 h (B) 12 h and (B) 18 h, and the XRD pattern of the samples (D).

As shown in Figure S1A, the surface of  $\text{MnCO}_3$  microcube was covered with small nanoparticles when the reaction was conducted for 6 h (denoted as MB-6). Besides, in the corresponding XRD pattern, the diffraction peak at  $28.3^\circ$  attributed to the (131) crystal plane of  $\text{Bi}_2\text{MoO}_6$  appears, and the diffraction peaks of  $\text{MnCO}_3$  exhibit lower intensity and broader width than that of pure  $\text{MnCO}_3$  microcube. It is thought that only small  $\text{Bi}_2\text{MoO}_6$  nanoparticles with low crystallinity can be formed on the surface of  $\text{MnCO}_3$  microcube at 6 h. With the time continued, these nanoparticles grew into small nanosheets which dispersed on the whole microcube surface (Fig. S1B). Furthermore, the anisotropic growth of  $\text{Bi}_2\text{MoO}_6$  nanosheets led to interconnected nanosheets. More importantly, the intensity of  $\text{Bi}_2\text{MoO}_6$  peaks of samples reacted for 12 h (MB-12) demonstrates significant increase with respect to the MB-6, resulting in the broad diffraction peaks indexed to the  $\text{Bi}_2\text{MoO}_6$  and  $\text{MnCO}_3$ . Interestingly, the sharp diffraction peaks can be easily distinguished and agree well with the  $\text{Bi}_2\text{MoO}_6$  and  $\text{MnCO}_3$  respectively in the XRD pattern of MB-18. As displayed in Fig. S1C, the well-defined hierarchical microbox consisting of microcube core and interconnected nanosheets can be clearly seen. It is well established that the  $\text{Bi}_2\text{MoO}_6$  nanosheet grew in size with higher crystallinity

as increasing the reaction time.<sup>1,2</sup> Finally, the nanosheet-built  $\text{Bi}_2\text{MoO}_6$  shell with uniform and perfect structure on  $\text{MnCO}_3$  microcube surface was developed as a result of the hydrothermal reaction for 24 h.

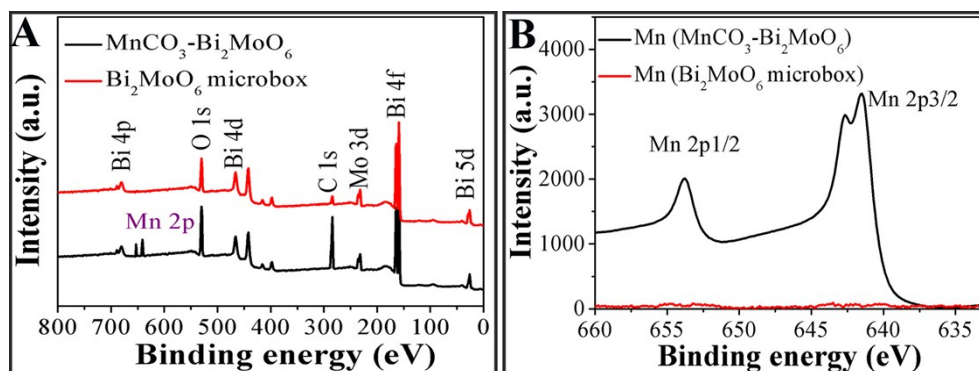

**Fig. S2.** XPS spectra of (A) survey and (B) Mn 2p of  $\text{MnCO}_3\text{-Bi}_2\text{MoO}_6$  microcube and  $\text{Bi}_2\text{MoO}_6$  microbox.

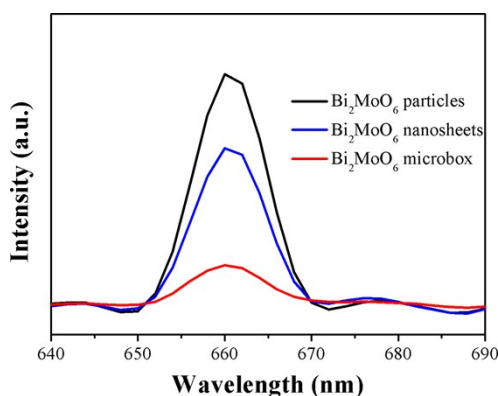

**Fig. S3.** Room temperature photoluminescence spectra of the samples with excitation wavelength at 440 nm.

Fig.S3 displays the PL spectra of  $\text{Bi}_2\text{MoO}_6$  particles,  $\text{Bi}_2\text{MoO}_6$  nanosheets and nanosheets-based  $\text{Bi}_2\text{MoO}_6$  microbox, manifesting the charge recombination efficiency of photogenerated electrons and holes. The samples demonstrate emission peaks between 650-670 nm with an excitation wavelength of 440 nm. As typically, the weaker intensity of PL peak corresponds to the reduced electron-hole recombination and facilitated charge separation.<sup>3,4</sup> It is clearly that the as-prepared hierarchical  $\text{Bi}_2\text{MoO}_6$  microbox shows the weakest photoluminescence peak among the samples, indicating that the recombination of photogenerated charge carriers have been dramatically decreased by constructing the hierarchical microbox structure.<sup>5</sup> It is confirmed that the nanosheets-built  $\text{Bi}_2\text{MoO}_6$  microbox structure could greatly prevent the recombination of electrons and holes, thus leading to the excellent photocatalytic performance.

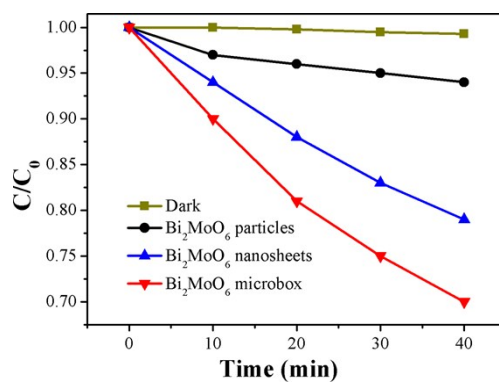

**Fig. S4.** Time-dependent photocatalytic degradation efficiency curve of phenol (50 mL,  $10^{-4}$  mol/L) by different photocatalysts under visible-light irradiation.

## Reference

- 1 H. Shirae, K. Hasegawa, H. Sugime, E. Yi, R.M. Laine, S. Noda, *Carbon*, **114**, 31–38.
- 2 A. Pei, G.Y. Zheng, F.F. Shi, Y.Z. Li, Y. Cui, *Nano Lett.*, 2017, **17**, 1132–1139.
- 3 X.X. Chang, T. Wang, P. Zhang, J.J. Zhang, A. Li, J.L. Gong, *J. Am. Chem. Soc.*, 2015, **137**, 8356–8359.
- 4 C.H. Zhao, W. Li, Y. Liang, Y. Tian, Q.Y. Zhang, *Appl. Catal. A: General*, 2016, **527**, 127–136.
- 5 Y. Hou, F. Zuo, A. Dagg, P.Y. Feng, *Angew. Chem.*, 2013, **125**, 1286–1290.
